# Supplementary material
Source: PubMed Central journal article supplement (PMC8908706)
Supplement: NIHMS1782550-supplement-2.pdf [file NIHMS1782550-supplement-2.pdf]

## ■ ASSOCIATED CONTENT

### SI Supporting Information

The Supporting Information is available free of charge at <https://pubs.acs.org/doi/10.1021/acs.biochem.1c00416>.

Additional chromatograms, mass spectra, and calibration curves for 4-NO<sub>2</sub>-Trp quantification and Trp-OH detection and supporting UV–vis spectral time courses (PDF)
